# **Testicular toxicity following chronic codeine administration is via oxidative DNA damage and up-regulation of NO and caspase 3**

Akhigbe RE, Ajayi A.F\*

Department of Physiology, College of Medicine, Ladoke Akintola University of Technology, Ogbomoso, Oyo, Nigeria.

\*Corresponding author: jy\_ayodeji@yahoo.com

Short title: Codeine induces testicular toxicity

## Abstract

**Background:** Codeine, a 3-methylmorphine, and other related opioids have been implicated in androgen suppression, although the associated mechanisms remain unclear.

**Aim:** Therefore, the objective of the current study was to elucidate the *in vivo* molecular mechanisms underlying codeine-induced androgen suppression.

**Methods:** This study made use of Twenty-one healthy male rabbits, distributed into three groups randomly, control and codeine-treated groups. The control had 1ml of normal saline daily *p.o.* The codeine-treated groups received either 4mg/kg b.w of codeine or 10mg/kg b.w of codeine *p.o.* for six weeks. Reproductive hormonal profile, testicular weight, enzymes, oxidative and inflammatory parameters, histological examination and apoptosis marker were evaluated to examine the effects of codeine use.

**Key findings:** Oral administration of codeine resulted in testicular atrophy and alterations in testicular histomorphology, elevated testicular enzymes, and suppression of circulatory and intra-testicular testosterone. These changes were associated with a marked rise in oxidative markers, including oxidative DNA damage, inflammatory response, and caspase-dependent apoptosis.

**Significance:** In conclusion, chronic codeine use resulted in testicular degeneration and testosterone suppression, which may be attributable to nitric oxide-/oxidativestress-mediated caspase-dependent apoptotic testicular cell death.

**Keywords:** Codeine, fertility, DNA damage, nitric oxide, apoptosis

## Introduction

Maintenance of fertility is of great concern in the male population, particularly with the rise in the cases of infertility due to male factor. Among the risk factors of male infertility are drug abuse and chronic drug use. Drugs have been shown to impair male fertility via hormonal and non-hormonal mechanisms [1]. They have been reported to suppress the hypothalamic-pituitary-testicular axis resulting in reduced biosynthesis of testosterone [2-5], and consequent decline in spermatogenesis. Some cause direct damage to the sperm cells [6, 7] while others block spermatogenesis [8].

Opioids are among the medications most frequently abused worldwide for self-management of pain and recreational purposes [9-11]. Prolong use of prescription-based opioids can lead to misuse, dependence, and mortality due to their rewarding and reinforcing properties [12], which has made the misuse of pharmacological opioids a growing concern. The prevalence of opioid abuse and misuse among adult opioid users in the United States was 12.8% and 12.5% in 2015 and 2016, respectively [13]. In 2016, about 34.3 million people, accounting for 0.7% of the global population, abused opioids [14].

Chronic use of opioids can lead to androgen deficiency [15-18]. Findings of Rubinstein and Carpenter [15] demonstrated that the highest odds of androgen deficiency are associated with opioids that maintain the most stable serum drug concentrations. Since the biosynthesis of testosterone occurs in a pulsatile manner, it is possible that the nadirs in the concentration of the drug that occurs more between doses of short-acting opioids permit testosterone production that is sufficient to maintain the constant circulating concentration of the androgen [15]. Contrary to this, long-acting opioids suppress testosterone synthesis more completely [15].

Although opioids can cause testicular toxicity, mechanisms associated with opioid-induced testosterone suppression remain unclear. Studies of Azari *et al.* [19] reported that tramadol destroyed testicular germinal layer and atrophy of seminiferous tubules. Their study also revealed that tramadol impaired spermatogenesis and led to necrosis of spermatocytes with nuclear changes such as karyolysis and karyorrhexis. Findings of Nna *et al.* [20] corroborate this report. They observed reduced Leydig cell, testicular germ cell and epididymal spermatozoa density in tramadol-treated rats.

Opioids differ in structure and lipophilicity [12, 15], hence may show variations in their mode of actions. Codeine has been reported to be the most commonly abused opioids globally [21]. Bakare and Isah [22] also reported a similar prevalence among Nigerian abusers. Despite the high prevalence of codeine abuse, there is a dearth of knowledge on the effect of chronic codeine use on testis and testosterone bioavailability. This study sought to demonstrate the possible mechanisms associated with codeine-induced testosterone suppression.

## **Methods**

### **Drugs and chemicals**

ELISA kits used for the analysis of reproductive hormones were from Monobind Inc., USA. ELISA kits for analysis of 8-hydroxy-2'-deoxyguanosine (8OHdG), Advanced Glycation endproducts (AGE), and caspase 3 were from Elabscience Biotechnology Co., Ltd, USA. All other reagents not mentioned above were of analytical grade and obtained from Sigma Chemical Co, USA.

### **Experimental animals**

Twenty-one male rabbits of comparable weight and age ( $13 \pm 2$  weeks,  $950 \pm 50$ g) housed in standard well-ventilated cages (maximum of 2 animals/cage), in the Animal Holdings of the Department of Physiology, Ladoke Akintola University of Technology, Ogbomoso, Nigeria. The rabbits were provided with standard chow and water *ad libitum* and subjected to the natural photoperiod of 12 h light/dark cycle. All animals were cared for humanely according to the conditions stated in the Guide for the Care and Use of Laboratory Animals' of the National Academy of Science (NAS), published by the National Institute of Health. The experiment followed the US NAS guidelines and ethical approval obtained from the Ethics Review Committee, Ministry of Health, Oyo State, Nigeria, with Reference Number AD13/479/1396.

### **Experimental procedure**

Animals were randomly allocated into three groups of seven rabbits each and administered the following:

Group I: control rats received 1ml of 0.9% normal saline.

Group II: low-dose codeine, received 4mg/kg b.w of codeine.

Group III: high-dose codeine, received 10mg/kg b.w of codeine.

All administrations were done orally using oro-pharyngeal cannula daily for six weeks. The 4mg/kg dose was a Human Equivalent Dose, while the 10mg/kg was chosen from dose-response curves to obtain a submaximal peak dose.

Twenty four hours after the last treatment, the over-night-fasted rabbits were weighed and sacrificed via intraperitoneal administration of ketamine (40mg/kg) and xylazine (4mg/kg) [23], and collection of blood samples was via cardiac puncture and centrifuged at 3000rpm for 10 minutes, and the serum separated for hormonal assay. Both testes were excised. Surrounding structures and adipose tissues were trimmed off, and the paired testicular weight of each animal

was determined using a sensitive electronic scale. The left testes were kept in sample bottles containing phosphate buffer for further biochemical assay [24, 25]. The testes were homogenized in the buffer, and the homogenate was centrifuged at 10,000rpm for 15 minutes at 4°C to obtain the supernatant for biochemical assay. The removed right testes were fixed in Bouin's solution for histological processing [26, 27].

### **Estimation of testicular enzymes**

The testicular activity of alkaline phosphatase (ALP) was determined using a standard kit (Teco Diagnostics, USA). Briefly, testicular tissue was homogenized in phosphate buffer. For each sample, 0.5mL of ALP substrate was dispensed into labeled test tubes and equilibrated to 37°C for 3 minutes. At timed interval, 50µl of each standard, control, and testicular homogenates were added to appropriate test tube. Deionized water was used as sample for reagent blank. The solution was mixed gently and incubated for 10 minutes at 37°C. Following this sequence, 2.5mL of ALP colour developer was added at timed interval and mixed thoroughly. The wavelength of the spectrophotometer was set at 590nm zero with reagent blank (wavelength range: 580-630nm). The absorbance of each sample was read and recorded.

The activity of acid phosphatase (ACP) was determined using a standard kit (Pointe Scientific Inc., USA). Immediately after separation of the supernatant, ACP was stabilized by adding 20µl of Acetate Buffer per 1.0ml of supernatant. The solution was mixed and stored in refrigerator until assay was performed. 1.0 ml of reagent was added to appropriately labeled tube, then 10 µl of L-Tartrate reagent was added and properly mixed. The spectrophotometer was zeroed with water at 405nm, and cuvette temperature set to 37°C. 100 µl of each sample was added, mixed and incubated for 5 minutes. After incubation, the absorbance was read and recorded every

minute for five minutes to determine  $\Delta A/\text{minute}$ . Values (U/L) were obtained by multiplying  $\Delta A/\text{minute}$  by the factor.

The activity of lactate dehydrogenase (LDH) was determined using a standard kit (Agappe Diagnostics Ltd., India). 1000 $\mu\text{L}$  of working reagent and 10 $\mu\text{L}$  of testicular homogenate was mixed and incubated at 37°C for 1 minute. The change in colour absorbance ( $\Delta\text{OD}/\text{min}$ ) was measured every minute for 3 minutes. The activity of the enzyme was calculated using the formula: LDH-P activity (U/L) = ( $\Delta\text{OD}/\text{min}$ ) x 16030

The activity of gamma glutamyl transferase (GGT) was determined using a standard kit (Pointe Scientific Inc., USA). The reagents were prepared according to the instruction manual. 1ml of the reagent was pipetted into appropriately labeled tubes: “control”, “sample”, and pre-incubated at 37°C for 5 minutes. The spectrophotometer was zeroed with water at 405nm. 100  $\mu\text{L}$  of the homogenate was added, mixed and returned to a thermo cuvette. After 60 seconds, the absorbance was read and recorded every minute for 2 minutes. The mean absorbance difference per minute ( $\Delta \text{Abs.}/\text{min.}$ ) was determined and multiplied by 1158 to obtain results in U/L.

### **Estimation of testicular total protein and glucose**

Testicular total protein concentration was measured using the biuret method [28], which depends on the presence of peptide bonds in all proteins. These peptide bonds react with  $\text{Cu}^{2+}$  ions in alkaline solutions to form a coloured product. The absorbance of which is measured spectrophotometrically at 540nm.

Testicular glucose concentration was determined using standard kit (Agappe Diagnostics Ltd., India). 1000 $\mu\text{L}$  of the working reagent and 10 $\mu\text{L}$  of the testicular homogenate were mixed and incubated for 10 minutes at 37°C. The absorbance of standard and sample were read against reagent blank, and the concentration of glucose determined by the formula:

$$\text{Glucose concentration (mg/dl)} = \frac{\text{Absorbance of sample}}{\text{Absorbance of standard}} \times 100$$

### **Estimation of serum and testicular levels of reproductive hormones**

Serum and testicular testosterone were determined using ELISA kit (Monobind Inc. USA; product number: 4806-300A), serum oestrogen was determined using ELISA kit (Monobind Inc. USA; product number: 4925-300A), serum FSH was assayed using ELISA kit (Monobind Inc. USA; product number: 506-300A), and serum LH was assayed using ELISA kit (Monobind Inc. USA; product number: 625-300A). The hormones were assayed as previously documented [25, 26]. Briefly, for serum testosterone assay, 10µL of standards, control and serum samples were dispensed into their respective wells. 100 µL Testosterone-HRP conjugate was added to each well. Substrate blank was dispensed into well A1. The wells were then covered with foil. Then incubation was carried out for 1 hour at room temperature, the foil was removed and well contents aspirated. Then 300 µL diluted wash solution was used three times to wash the wells. The soak time between each wash cycle was more than 5 seconds. The remaining fluid was carefully removed by tapping the strips on tissue paper. 100 µL of TMB substrate solution was added into all wells. The wells were incubated for 15 minutes at room temperature in the dark. 100 µL stop solution was dispensed into all wells in the same order and the same rate as for the substrate. The absorbance of the specimen was read at 450nm within 20 minutes after addition of the stop solution.

Testicular testosterone measurement was determined similarly; however, the testes supernatant obtained from testicular homogenate was used instead of the serum.

Similarly, determination of serum oestrogen was by dispensing 25µL of standards, control and serum samples into their respective wells. 50µL of E2 Biotin reagent was added to all wells and

incubated for 30 minutes at 37°C after which 50µL of enzyme conjugate was added to each well. Well A1 was left for substrate blank. The wells were covered with foil. Incubated of the wells was for 90 minutes at room temperature. The foil was removed and well contents aspirated. 300 µL diluted wash solution was used to wash the wells three times. The soak time between each wash cycle was more than 5 seconds. The remaining fluid was carefully removed by tapping the strips on tissue paper. 100µL of TMB substrate was added into all wells. Incubation of the wells was carried out in the dark at 37°C for 30 minutes. 50 µL of stop solution was then dispensed into all wells in the same order and time interval as the substrate. The absorbance of the specimen was read at 450nm within 20 minutes after the addition of the stop solution.

For FSH assay, 50µL of standards, control and serum were dispensed into their respective wells. 100 µL of the conjugate was added to each well. Substrate blank was dispensed into well A1. The wells were covered with foil. Incubation of the wells was carried out for 1 hour at 37°C. After 1 hour the foil was removed and well contents aspirated, wells washed three times with 300 µL of diluted wash solution. The soak time between each wash cycle was more than 5 seconds. The remaining fluid was carefully removed by tapping the strips on tissue paper. 100 µL of TMB substrate was added into all wells. The wells were incubated for 15 minutes at room temperature in the dark. 50µL of stop solution was dispensed into all wells in the same order and rate as for the substrate. The absorbance of the specimen was read at 450nm.

For LH assay, 50µL of standards, control and serum samples were dispensed into their respective wells in duplicates. 100 µL conjugate was added to each well. Substrate blank was dispensed into well A1. The wells were left to incubate for 1 hour at room temperature. Contents of wells were aspirated after 1 hour, and the wells were washed three times using 300 µL diluted wash solution. The remaining fluid was carefully removed by tapping the strips on tissue paper. 100µL

of TMB substrate solution added into all wells. The wells were incubated for 15 minutes at room temperature in the dark. 100µL of stop solution was dispensed into all wells in the same order and rate as for the substrate. The absorbance of the specimen was done at 450nm.

The concentrations of the hormones were obtained from the absorbance values using standard curves obtained.

### **Estimation of testicular oxidative markers, anti-oxidants, 8OHdG and caspase 3**

Lipid peroxidation concentration determination is by measuring the thiobarbituric acid reactive substances (TBARS) produced during lipid peroxidation as previously documented [29]. This method is dependent on the reaction between 2- thiobarbituric acid (TBA) and malondialdehyde, an end product of lipid peroxidation. On heating in acidic pH, a pink chromogen complex ([TBS] 2-malondialdehyde adduct) is formed and measured by its absorbance at 532 nm. Briefly, 200µL of the sample was deproteinised with 500µL of Trichloroacetic acid (TCA) and centrifuged at 3000rpm for 10minutes. 1mL of 0.75% TBA was added to 0.1mL of the supernatant and boiled in a water bath for 20minutes at 100°C and cooled with ice water. The absorbance of the sample/standard was read at 532nm with a spectrophotometer against the blank. The concentration of TBARS generated was extrapolated from the standard curve.

AGE was determined using a standard ELISA kit (Elabscience Biotechnology Co., Ltd, USA; product number: E-EL-010296T) following the manufacturer's manual. The standard working solution was added to the first two columns: Each concentration of the solution was added in duplicate, to one well each, side by side (50 uL for each well). Samples were added to the other wells (50 uL for each well). Immediately, 50µL of Biotinylated Detection Ab working solution was added to each well. The plate was then covered with the provided sealer in the kit and incubated for 45 minutes at 37°C. Care was made to ensure that the solutions were added to the

bottom of the micro ELISA plate well. Also, avoidance of touching the inside wall and causing foaming as much as possible was ensured. The solution aspirated from each well, and 350 uL of wash buffer added to each well. These were soaked for 1-2 minutes, and the solution was aspirated from each well, then patted dry against clean absorbent paper. The wash step was repeated three times. 100 µL of HRP Conjugate working solution was added to each well and covered with the plate sealer then incubated for 30 minutes at 37°C. The solution from each well was aspirated, and the wash process was repeated five times. Then 90 µL of Substrate Reagent was added to each well and covered with a new plate sealer then incubated for another 15 minutes at 37°C. The plate was protected from light. After this, 50 µL of stop solution was added to each well. The value of the light density of each well was determined with a microplate reader set to 450 nm.

8OHdG and caspase three levels were determined as described for AGE using ELISA kits (Elabscience Biotechnology Co., Ltd, USA) with product numbers E-EL-0028 and E-EL-RB0656, respectively.

Hydrogen peroxide (H<sub>2</sub>O<sub>2</sub>) generation was determined by the method described by Nouroozzadeh *et al.* [30]. The method uses a colour reagent that contains xylenol orange dye in an acidic solution with sorbitol and ferrous ammonium sulphate that reacts to produce a purple colour in proportion to the concentration of H<sub>2</sub>O<sub>2</sub>. The assay mixture was thoroughly vortex-mixed until it foamed. A pale pink colour complex was generated after incubation for 30 minutes at room temperature. The absorbance was read against blank (distilled water) at 560nm wavelength. The concentration of hydrogen peroxide generated was extrapolated from the standard curve.

Myeloperoxidase activity was determined as previously documented by Dessler *et al.* [31]. Myeloperoxidase catalyses the oxidation of guaiacol to oxidised guaiacol in the presence of hydrogen peroxide. Guaiacol in its oxidised form has a brown colour which is measured photometrically at 470nm wavelength. The concentration of oxidised guaiacol produced in the reaction is proportional to the colour intensity produced.

Superoxide dismutase (SOD) activity was determined as previously reported [32, 33]. Briefly, 1mL of the sample was diluted in 9mL of distilled water to make a 1 in 10 dilutions. An aliquot of 0.2mL of the diluted sample was added to 2.5mL of 0.05M carbonate buffer (pH 10.2) for spectrophotometer equilibration and the reaction started by the addition of 0.3mL of freshly prepared 0.3mM adrenaline to the mixture which was quickly mixed by inversion. The reference cuvette contained 2.5mL buffer, 0.3mL of the substrate (adrenaline) and 0.2mL of water. The increase in absorbance was monitored every 30 seconds for 150 seconds 480nm.

Testicular catalase activity was determined as previously documented [34] with some modifications. Briefly, 1ml of the supernatant of the testicular homogenate was mixed with 19ml of diluted water to give a 1:29 dilution of the sample. The assayed mixture contained 4ml of H<sub>2</sub>O<sub>2</sub> solution (800μmoles) and 5ml of phosphate buffer in a 10ml flat bottom flask. 1ml of properly diluted enzyme preparation was mixed with the reaction mixture by a gentle swirling motion at 37°C room temperature. 1ml of the reaction mixture was withdrawn and blown into 2ml dichromate/acetic acid reagent at 60 seconds intervals. The H<sub>2</sub>O<sub>2</sub> contents of the withdrawn sample were determined. Catalase levels in the sample are determined by comparing absorbance at 653 nm to that of a certified catalase standard.

The method of Beutler *et al.* [35] was used in estimating the level of reduced glutathione (GSH). An aliquot of the sample was deproteinized by the addition of an equal volume of 4%

sulfosalicylic acid, which was centrifuged at 4,000rpm for 5 minutes. After that, 0.5ml of the supernatant was added to 4.5ml of Ellman's reagent. A blank was prepared with 0.5ml of the diluted precipitating agent and 4.5ml of Ellman's reagent. Reduced glutathione, GSH, is equal to the absorbance at 412nm.

Testicular glutathione peroxidase (GPx) activity was determined according to the method of Rotruck *et al.* [36] with some modifications. Briefly, the reaction mixture containing the sample was incubated at 37°C for 3 minutes after which 0.5mL of 10% trichloroacetic acid (TCA) was added and after that centrifuged at 3000rpm for 5 minutes. To 1mL of each of the supernatants, 2mL of phosphate buffer and 1mL of 5'-5'- dithiobis-(2-dinitrobenzoic acid (DTNB) solution was added, and the absorbance was read at 412nm against a blank. Glutathione peroxidase activity was observed by plotting the standard curve, and then the concentration of the remaining GSH extrapolated from the curve.

Testicular Glutathione-S-transferase activity was determined using the method described by Habig *et al.* [37]. The method is based on the relatively high activity of glutathione-S-transferase with 1-chloro-2,4,-dinitrobenzene as the second substrate. The prepared medium of the assay and the reaction was allowed to run for 60 seconds, then the absorbance was read against the blank at 340nm. The temperature was put at approximately 37°C.

Testicular nitric oxide was determined using Griess Reaction as previously documented [38]. 100µL of Griess reagent, 300µL of nitrate-containing testicular homogenate, and 2.6ml of deionized water were mixed in a spectrophotometer cuvette and incubated for 30 minutes at room temperature. The blank was prepared by mixing 100µL of Griess reagent and 2.9ml of deionised water. The absorbance of the nitrate-containing sample was measured at 548nm relative to the reference sample.

## **Histology**

Sections of the fixed tissues were obtained from paraffin blocks and stained with Haematoxylin and Eosin (H&E) [39]. Stained sections of the testis were observed under a digital light microscope at various magnifications and photographs were taken.

## **Statistical analysis**

Data were expressed as mean  $\pm$  SD. The data comparisons made use of one-way analysis of variance (ANOVA) followed by Tukey's post hoc test for pairwise comparison. Pearson's bivariate correlation was done to assess the correlation between selected indices of testicular functions and 8-OHdG, nitric oxide and caspase 3. Statistical Package for Social Sciences (SPSS, version 16) was used for the analysis. Statistical significance was set at  $p < 0.05$ .

## **Results**

### **Effect of chronic codeine use on body weight, testicular weight and relative testicular weight**

Table 1 represents the body and testicular weights of the treated and control groups. Oral administration of codeine for six weeks did not statistically affect the body weight gain. However, oral administration of 4mg/kg and 10mg/kg bodyweight of codeine showed 50% and 68% decline in paired testicular weight, respectively. The data on paired testicular weight presented in Table 1 showed a dose-dependent decrease in the paired testicular weight of the treated rabbits. The relative testicular weight determined as the percentage of the ratio between the paired testicular weight and body weight also showed significant differences across the groups. The decline in the relative testicular weight for codeine-treated rabbits at 4mg/kg and 10mg/kg body weight was 50% and 200% respectively below the control rabbits.

### **Effect of chronic codeine use on testicular enzymes**

Figure 1 shows the activities of testicular enzymes (alkaline phosphatase (ALP), acid phosphatase (ACP), lactate dehydrogenase (LDH) and  $\gamma$ -glutamyl-transferase (GGT)) in control and experimental rabbits. The activities of these enzymes were observed to be significantly raised in the treated rabbits when compared with the control rabbits ( $p < 0.05$ ). Oral administration of codeine for six weeks at 4mg/kg body weight led to a 29% rise in ALP, while at 10mg/kg body weight caused a further rise by 6.5%. Similarly, oral codeine administration at 4mg/kg body weight led to a rise in ACP, LDH and GGT by 19%, 13.7%, and 11.8% respectively. At 10mg/kg body weight, codeine administration further increased the activities of LDH, and GGT by 4.4% and 12% respectively, and decreased ACP activity by 0.2% when compared to rabbits who had 4mg/kg body weight of codeine. Although the difference observed in the treated groups were statistically similar, there was a significant difference in GGT activities of both treated groups.

### **Effect of chronic codeine use on testicular total protein and glucose**

Figure 2 shows testicular levels of total protein and glucose. Although oral administration of codeine at four and 10mg/kg body weight led to a rise in total testicular protein by 3.8% and 7.5% respectively, and a similar increase in testicular glucose by 12.9% and 18.6% respectively when compared with the control; these changes were marginal across all groups.

### **Effect of chronic codeine use on serum and testicular male reproductive hormones**

Figure 3 shows the influence of chronic oral administration of codeine on serum concentrations of testosterone, LH, and FSH, and testicular level of testosterone in rabbits. Circulatory concentrations of LH and FSH in codeine-treated animals significantly increased when compared with those of the control animals. However, oral administration of codeine at four and 10mg/kg body weight significantly suppressed circulatory testosterone levels by 24% and 34%

respectively when compared with the control. Similarly, codeine treatment at four and 10mg/kg body weight led to a significant dose-dependent decline in the testicular concentration of testosterone by 24.5% and 34.7% when compared with the control.

Figure 4 shows the values of hormonal fertility indices. The results showed that the values of serum testosterone/luteinizing hormone (T/LH) and testosterone/oestrogen (T/E<sub>2</sub>) were significantly reduced by codeine exposure. Low dose codeine at 4mg/kg body weight caused 29% and 12% decline in T/LH and T/E<sub>2</sub>, respectively when compared with the control. Administration of high dose codeine at 10mg/kg body weight caused further decline in these indices by 35% and 2.5% respectively.

#### **Effect of chronic codeine use on testicular oxidative markers and enzymatic anti-oxidants**

Oxidative damage induced by oral administration of codeine in testicular tissue resulted in significant dose-dependent rise in the levels of lipid peroxidation index (malondialdehyde, MDA), oxidative protein denaturation index (AGE), hydrogen peroxide and myeloperoxidase (Figure 5). On the other hand, codeine treatment significantly lowered the levels of SOD, catalase, GSH, GPx and GST. These reductions were also dose-dependent (Figure 6).

#### **Effect of chronic codeine use on testicular DNA damage, nitric oxide and apoptosis**

Compared with the control group, testicular oxidative DNA damage significantly increased in the codeine-treated groups (Figure 7). Low-dose codeine at 4mg/kg body weight led to 27% increase in testicular oxidative DNA damage, while high-dose codeine at 10mg/kg body weight led to 41% increase in testicular oxidative DNA damage when compared with the control. Also, a significant increase in the testicular level of nitric oxide was observed in codeine-treated rabbits (Figure 8). The rise in nitric oxide seen was dose-dependent. Oral administration of

codeine for six weeks at four and 10mg/kg body weight led to 35.6% and 55.7% increase in testicular nitric oxide level.

The assessment of the role of apoptosis was by measuring the concentration of caspase three. Codeine treatment was observed to cause caspase-mediated apoptosis in a dose-dependent manner (Figure 9). At four and 10mg/kg body weight, oral administration of codeine significantly increased the testicular level of caspase three by 66.8% and 81% respectively when compared with the control.

### **Correlation study**

A negative correlation was observed between testicular weight, serum and intra-testicular testosterone, and hormonal fertility indices, and 8-OHdH, nitric oxide and caspase 3 activity (Table 2).

### **Histological findings**

Findings of histopathological examination supported the present biochemical findings. Photomicrographs (Figure 10) show control rabbits with normal seminiferous tubules containing healthy germ cells, including spermatogonia cells and Sertoli cells, and normal maturation stages with the presence of spermatozoa within their lumen. The interstitial spaces show healthy Leydig cells. Oral administration of codeine at four and 10mg/kg body weight caused alteration of testicular histoarchitecture. Codeine administration resulted in thickened propria indicative of cessation of spermatogenesis and vascular congestion and associated vacuolation, sloughed germ cells and maturation arrest.

### **Discussion**

The abuse of codeine, a 3-methylmorphine, remains a global health threat. This drug molecule has been reported to suppress testosterone production. However, this study is the first to demonstrate the toxic effect of codeine on the testis and testicular function via oxidative- and inflammation-mediated caspase-dependent apoptosis. Ranging from a reduction in testicular weight, impaired testicular functions, spermatogenesis cessation, reduced hormonal fertility indices, steroidogenesis, as well as induction of testicular oxidative damage, inflammation, and caspase-mediated apoptosis observed in our study, the need to address the menace of opioid abuse would go a long way in tackling the challenges posed by drug-induced infertility.

The reduction in testicular weight observed in this study is a pointer to codeine-induced alteration in metabolic process that could be associated with excessive tissue break down [40, 41]. Studies have reported the possibility of assessing organ toxicity by the organ weight [42, 43]. Though there was a similar body weight change in the treated and control animals, the decrease in testicular weight, a valuable index of reproductive toxicity, seen in the codeine-treated rabbits indicates that the drug molecule has a toxic effect on the testis and consequent depression of testicular metabolism and function. The reduction in testicular weight following codeine use explains the associated reduction of testosterone bioavailability and disrupted spermatogenesis observed in this study. The decline in the circulatory concentrations of testosterone seen in codeine treatment aligns with previous reports [15-18]. The decline in serum and testicular levels of androgen and cessation of spermatogenesis observed in codeine-treated animals could be partly due to codeine-induced loss of testicular tissues, and impairment of testicular metabolism and function.

Codeine administration induced oxidative stress in the rabbit testis, evident by enhanced lipid peroxidation, oxidative protein denaturation and compromised enzymatic anti-oxidant defence

system revealed by decreased glutathione systems with a concomitant reduction in superoxide dismutase and catalase. These findings agree with the report of Nna and Osim [44] that demonstrated the oxidative effects of tramadol on rat testis. Oxidative stress is as a result of an imbalance between reactive oxygen species (ROS) generation and intracellular ROS scavenging capacity. Although the increase in testicular oxidative stress has been reported following use of opioid-like tramadol [44], no study has reported whether or not codeine shares the same activity. The testes are quite prone to ROS-induced injury and peroxidative damage consequent to their high concentrations of polyunsaturated fatty acids and low antioxidant capacity [45].

Reduced glutathione (GSH) scavenges ROS by forming oxidized glutathione (GSSG) and other disulfides. Increased oxidative stress promotes the formation and efflux of GSSG, and glutathione reductase (GR) mediates the reduction of GSSG to GSH [46]. This reaction requires the reduced form of nicotinamide adenine dinucleotide phosphate (NADPH), which is provided by glucose-6-phosphate dehydrogenase (G6PD) of the pentose phosphate pathway [46]. Codeine-induced decline in the activity of GSH is indisputably likely consequent to reduced G6PD activity and the resultant decrease in the availability of NADPH. GPx is another constituent of the GSH redox cycle. It is the primary enzyme responsible for hydrogen peroxide ( $H_2O_2$ ) elimination in the testis [47]. GST is well known to catalyse the conjugation of GSH to a range of substrates resulting in detoxification. GPx, together with GST, is vital in  $H_2O_2$  metabolism. Thus, the decrease in the activity of GPx and GST, and a rise in the level of  $H_2O_2$  observed in the present study in codeine-treated rabbits show that codeine led to peroxide-induced testicular damage. SOD is well known to catalyse the rapid dismutation of superoxide radicals to  $H_2O_2$  and dioxygen while catalase converts the formed  $H_2O_2$  into water and molecular oxygen. The significant reduction in the activities of testicular SOD and catalase observed in

codeine-treated rabbits in the present study inarguably contributes to the excess  $H_2O_2$  seen. Therefore, the overall decline in the glutathione system, SOD and catalase activities triggers robust oxidative stress.

There is growing evidence that oxidative damage permanently occurs to lipids of cellular membranes, proteins, and DNA. In nuclear and mitochondrial DNA, 8-OHdG is a predominant form of free radical-induced oxidative lesions and is a biomarker for oxidative DNA damage [48]. The rise in the level of this biomarker in codeine-treated animals reveals that codeine use promotes testicular oxidative DNA damage.

This study revealed that administration of codeine does not just trigger oxidative damage; it also up-regulates testicular nitric oxide (NO) and cysteine-aspartic proteases (caspase) 3. The overwhelming oxidant stress observed following codeine treatment ultimately excites an inflammatory reaction evident by a rise in testicular NO. It may be secondary to stimulation of NF- $\kappa$ B and enhancement of inducible nitric oxide synthase (iNOS) [49, 50], essential factors in NO production. NO couples with  $O_2^-$  to form peroxynitrite ( $ONOO_2^-$ ) which is hugely more reactive and harmful as compared to NO or  $O_2^-$  alone. Nitric oxide has also been documented to trigger lipid peroxidation, protein degradation, and DNA damage [50-52]. Hence, the enhancement of testicular NO seen in codeine treatment also accounts for testicular damage.

Caspases are significant mediators of apoptosis. They are synthesized as pro-enzymes and activated by internal and external stimuli [53]. Caspase 3 is the most critical effector caspase, and the activation of its pathway is a hallmark of apoptosis used as a marker of death cascade [54, 55]. Findings from this study revealed that codeine up-regulated testicular caspase three expressions. The protease may cleaved inhibitor of caspase-activated DNase I (ICAD) which after then stimulate caspase-activated DNase I (CAD) [56, 57]. CAD is known to degrade

chromosomal DNA within the nucleus and cause chromatin condensation, resulting in DNA fragmentation and cell apoptosis.

Activities of testicular enzymes ALP, ACP, LDH and  $\gamma$ -GT are markers of spermatogenesis [58]. They are indices of Sertoli function. The increased activities of ALP and ACP in codeine-administered animals may reflect the release of these non-specific phosphatases from the lysosomes of the degenerating cells and rapid catabolism of the testicular cells [59]. Codeine-induced increased activity of LDH observed in this study reflect testicular degeneration. It is likely due to a compensatory adaptation in an attempt to improve spermatogenesis and testicular regeneration from oxidative damage.  $\gamma$ -GT is a primary index of Sertoli function, and its activity is parallel to Sertoli cell maturation and replication [60]. The marked rise in  $\gamma$ -GT activity in codeine-treated animals in our present study suggests impaired Sertoli cell function and spermatogenesis, manifested by gross testicular atrophy, poor histoarchitecture of the testis, cessation of spermatogenesis, and germ cell maturation arrest.

The dose-dependent diminution in circulatory and intra-testicular concentrations of testosterone in codeine-treated rabbits is obviously due to oxidative damage and caspase-dependent apoptosis of the testes with associated testicular atrophy. Also, suppression of the levels of this androgen explains the rise in LH and FSH observed in codeine-treated animals, possibly via negative pituitary feedback. Spermatogenesis requires a high level of intra-testicular testosterone [61, 62]. In the present study, the cessation of spermatogenesis and the arrest of germ cell maturation seen in codeine-treated animals is a reflection of the reduced testicular level of testosterone. FSH has been documented to stimulate pyruvate and lactate production in Sertoli cells [63], while LDH catalyzes the interconversion of pyruvate and lactate together with the concomitant

interconversion of NADH and NAD<sup>+</sup>. Thus, the raised FSH level in the current study in codeine-treated animals may account for the increased LDH activity seen.

T/LH and T/E<sub>2</sub> are hormonal fertility indices. T/LH is a known index of Leydig cell function [64], while high T/E<sub>2</sub> is a pointer to fertility [62]. Assessment of T/LH provides more meaningful information than comparisons of testosterone and LH levels separately [64]. In this study, we found that these hormonal fertility indices decreased in codeine-treated rabbits, indicating impaired Leydig cell function, which was manifested by suppression of both circulatory and intra-testicular levels of testosterone.

## **Conclusion**

Our current study reveals a novel mechanistic pathway for codeine-induced androgen suppression. Codeine depletes testicular glutathione, SOD, and catalase resulting in increased ROS production and inflammatory response which in turn leads to testicular lipid peroxidation, protein denaturation/inactivation, and DNA damage, with consequent testicular dysfunction and caspase-mediated testicular apoptosis.

## **Declarations**

## **Abbreviations**

Not applicable

## **Ethics approval and consent to participate**

The experiment followed the US NAS guidelines and ethical approval obtained from the Ethics Review Committee, Ministry of Health, Oyo State, Nigeria, with Reference Number AD13/479/1396.

## **Consent for publication**

All authors agree to the publication of this article

## **Availability of data and material**

Not applicable

## **Competing interest**

The authors declare that there are no competing interests

## **Funding**

Not applicable

## **Authors' contributions**

ARE and AAF conceptualized and designed the study. ARE did the first draft. AAF reviewed the first draft.

## **Acknowledgements**

Not applicable

## **References**

1. Semet M, Paci M, Saias-Magnan J, Metzler-Guillemain C, Boissier R, Lejeune H and Perrin J. The impact of drugs on male fertility: a review. *Andrology* 2017, 5, 640–663.

2. Abs R, Verhelst J, Maeyaert J, Van Buyten JP, Opsomer F, Adrianensen H, Verlooy J, Van Havenberg T, Smet M, Van Acker K. Endocrine consequences of long-term intrathecal administration of opioids. *J Clin Endocrinol Metab.* 2000;85:2215–2222.
3. Aloisi AM, Aurilio C, Bachiooco V, Biasi G, Fiorenzani P, Pace MC, Paci V, Pari G, Passavanti G, Ravaioli L, Sindaco G, Vellucci R, Ceccarelli I. Endocrine consequences of opioid therapy. *Psychoneuroendocrinology.* 2009;34(Suppl 1):S162–8.
4. Aloisi AM, Ceccarelli I, Fiorenzani P, Maddalena M, Rossi A, Tomei V, Sorda G, Danielli B, Rovini M, Cappelli A, Anzini M, Giordano A. Aromatase and 5-alpha reductase gene expression: modulation by pain and morphine treatment in male rats. *Mol Pain.* 2010;6:69.
5. Agirregoitia E, Valdivia A, Carracedo A, Casis L, Gil J, Subiran N, Ochoa C, Irazusta J. Expression and localization of delta-, kappa-, and mu-opioid receptors in human spermatozoa and implications for sperm motility. *J Clin Endocrinol Metab.* 2006;91:4969–75.
6. Chen Y, Zhang Z, Lin Y, Lin H, Li M, Nie P, Chen L, Qiu J, Lu Y, Chen L, Xu B, Lin W, Zhang J, Du H, Liang J & Zhang Z. Long-term impact of immunosuppressants at therapeutic doses on male reproductive system in unilateral nephrectomized rats: a comparative study. *Biomed Res Int* 2013, 690382.
7. He Z, Qiu J, Li J, Zhao D, Chen G and Chen L. Long-term effects of conversion from cyclosporine to rapamycin on testicular function and morphology in a rat transplantation model. *Transpl Proc* 2013;45: 763–769.

8. Rovira J, Diekmann F, Ramirez-Bajo MJ, Bannion-Maneus E, Moya-Rull D & Campistol JM. Sirolimus-associated testicular toxicity: detrimental but reversible. *Transplantation* 2012;93: 874–879.
9. McCabe S.E, Cranford J.A, Boyd C.J and Teter C.J. Motives, diversion and routes of administration associated with nonmedical use of prescription opioids, *Addict. Behav.* 32 (2007) 562–575; DOI: 10.1016/j.addbeh.2006.05.022.
10. McCabe S.E, Boyd C.J and Teter C.J. Subtypes of nonmedical prescription drug misuse, *Drug Alcohol Depend.* 102 (2009) 63–70.
11. Cooper R. ‘I can’t be an addict. I am.’ Over-the-counter medicine abuse: a qualitative study, *BMJ Open* 3 (2013) e002913.
12. McMillan D. Brain CYP2D Metabolism of Opioids Impacts Brain Levels, Analgesia, and Tolerance. A thesis submitted in conformity with the requirements for the degree of Doctor of Philosophy Department of Pharmacology and Toxicology University of Toronto, 2018.
13. NSDUH. 2016 National Survey on Drug Use and Health, Rockville, MD. *Substance Abuse and Mental Health Services Administration*, 2017.
14. United Nations Office on Drugs and Crime (UNODC). World Drug Report: Global overview of drug demand and supply; latest trends, cross-cutting issues, 2018.
15. Rubinstein AL and Carpenter DM. Association between commonly prescribed opioids and androgen deficiency in men: a retrospective cohort analysis. *Pain Medicine* 2017; 18: 637-644.
16. [Lehtihet M](#), [Andersson A](#), [Börjesson A](#), [Schulze J](#), [Rane A](#), [Ericsson M](#), [Ekström L](#). Codeine influences the serum and urinary profile of endogenous androgens but does not

- interact with the excretion rate of administered testosterone. [Drug Test Anal.](#) [2018](#);10(4):723-730.
17. Daniell HW. Transient low testosterone levels after oral hydrocodone may contribute to misdiagnosis of hypogonadism. *J Opioid Manag.* 2016;12(5):310-312.
  18. [Eichenbaum G](#), [Göhler K](#), [Etropolski M](#), [Steigerwald I](#), [Pergolizzi J](#), [Kim M](#), [Vorsanger G](#). Does tapentadol affect sex hormone concentrations differently from morphine and oxycodone? An initial assessment and possible implications for opioid-induced androgen deficiency. *J Opioid Manag.* [2015](#);11(3):211-27.
  19. Azari O, Emadi L, Kheirandish R, Bafti HS, Nejad MR, Faroghi F. The Effects of Long-term Administration of Tramadol on Epididymal Sperm Quality and Testicular Tissue in Mice. *IJVS* 2014; 9(1); Serial No:20.
  20. Nna VU, Udefa AL, Ofutet EO, Osim EE. Testicular and Epididymal Histology of Rats Chronically Administered High Doses of Phosphodiesterase-5 Inhibitors and Tramadol. *Niger. J. Physiol. Sci.* 2017; 32:55-61.
  21. International Narcotics Control Board. Narcotic drugs estimated world requirements for 2012. Vienna: INCB, 2012.
  22. Bakare AT, Isah BA. Psychoactive substances use among in-patients in a Nigerian neuropsychiatric hospital: prevalence, pattern and presentation. *MOJ Addict Med Ther.* 2016; 2(1):18–22.
  23. Ajayi AF, Aniviye BO, Kehinde BD, Akintola AO. Age-related Changes in the Expression of Heat Shock Protein 70 and 90 on the Gastric Mucosa During Gastric Ulcer Healing. *UK Journal of Pharmaceutical and Biosciences* 2018; 6(4): 01-10.

24. Ige SF, Olaleye SB, Akhigbe RE, Akanbi TA, Oyekunle OA, Udoh US. Testicular toxicity and sperm quality following cadmium exposure in rats: Ameliorative potentials of *Allium cepa*. J Hum Reprod Sci 2012;5:37-42.
25. Ige SF, Akhigbe RE. The role of *Allium cepa* on aluminum-induced reproductive dysfunction in experimental male rat models. J Hum Reprod Sci 2012;5:200-5.
26. Ajayi AF, Akhigbe RE. Antifertility activity of *Cryptolepis sanguinolenta* leaf ethanolic extract in male rats. J Hum Reprod Sci 2012;5:43-7.
27. Ajayi A.F, Akhigbe R.E, Ajayi L.O. Hypothalamic-pituitary-ovarian axis in thyroid dysfunction. West Indian Medical Journal 2013;62(9):835-838.
28. Gornall AG, Bardawill CJ, and David MM, Determination of serum proteins by means of the biuret reaction. The Journal of Biological Chemistry 1949; 177 (2): 751–766.
29. Adegunlola JG, Afolabi OK, Akhigbe RE, Adegunlola GA, Adewumi OM, Oyeyipo IP, Ige SF, Afolabi AO. Lipid peroxidation in brain tissue following administration of low and high doses of arsenite and L-ascorbate in Wistar strain rats. Toxicol Int 2012;19:47-50.
30. Nouroozzadeh J, Tajaddinisarmadi J, Wolff SP. Measurement of plasma hydroperoxide concentrations by the Ferrous Oxidation-Xylenol Assay in conjunction with Triphenylphosphine. Analytical Biochemistry 1994;220(2):403-409.
31. Dessler RK, Himmelhoch SR, Evans WH, Januska M, Mage M, and Shelton E. *Arch. Biochem. Biophys.* 1972, 148, 452-465
32. Fridovich I, Misra HP. The role of superoxide anion in the autooxidation of epinephrine and a simple assay for superoxide dismutase. J Biol Chem 1972;247:3170-5.

33. Ige SF, Akhigbe RE, Adewale AA, Badmus JA, Olaleye SB, Ajao FO, Saka WA, and Owolabi O.Q. Effect of *Allium cepa* (Onion) extract on Cadmium – induced nephrotoxicity in rats. *Kidney Res. J.* 2011; 1 (1): 41-47.
34. Euler HV, Josephson K. Uber katalase. *I European J Org Chem* 1972;452:158-181.
35. Beutler E, Duron O, and Kelly BM. Improved method for the determination of blood glutathione. *J Lab Clin Med* 1963;61:882-8.
36. Rotruck JT. Pope AL, Ganther HE, Swanson AB, Hafeman DG, Hoekstra WG. Selenium: biochemical role as a component of glutathione peroxidase. *Science* 1973;179(4073):588-90.
37. Habig WH, Pabst MJ, Jakoby WB. Glutathione-S-transferases. The first enzymatic step in mercapturic acid formation. *J Biol Chem* 1974;249(22):7130-9.
38. Ridnour LA, Sim JE, Hayward MA, Wink DA, Martin SM, Buettner GR, and Spitz DR. A spectrophotometric method for the direct detection and quantitation of nitric oxide, nitrite, and nitrate in cell culture media. *Analytical Biochemistry* 2000; 281:223-229
39. Ebokaiwe AP, Ijomone OM, Osawe SO, Chukwu CJ, Ejike CECC, Zhang G and Wang F. Alteration in sperm characteristics, endocrine balance and redox status in rats rendered diabetic by streptozotocin treatment: attenuating role of *Loranthus micranthus*. *Redox Report* 2018; 23:(1):194-205.
40. Atalay UB, Ilhan F, Gulyuz F. The effects of sildenafil citrate and vitamins A. C and E on testicular damage in alloxan-diabetic rats. *J Anim Vet Adv.* 2012;11:56–63.
41. Adedara IA, Awogbindin IO, Anamelechi JP. *Garcinia kola* seed ameliorates renal, hepatic, and testicular oxidative damage in streptozotocin- induced diabetic rats. *Pharm Biol.* 2014. DOI: 10.3109/13880209.2014.937504.

42. Ige S.F, Akhigbe R.E, Edeogho O, Ajao F.O, Owolabi O.Q, Oyekunle O.S, Ajayi A.F.  
Hepatoprotective activities of *Allium cepa* in cadmium-treated rats. Int J Pharm Pharm  
Sci 2011; 3(5): 60-63.
43. Nadir Rencuzogullan and Suat Erdogan. Oral administration of lycopene reverses  
cadmium-suppressed body weight loss and lipid peroxidation in rats. Biol Trace Elem  
Res 2007;118:175-183
44. Nna VU, Osim EE. Testicular toxicity following separate and combined administration of  
PDE5 inhibitors and opioid: Assessment of recovery following their withdrawal.  
*Andrologia*. 2017;49:e12669.
45. Vernet P, Aitken R.J, Drevet JR. Antioxidant strategies in the epididymis. Mol. Cell.  
Endocrinol. 2004;216: 31–39.
46. Abd El Tawab AM, Shahin NN, AbdelMohsen MM. Protective effect of Satureja  
montana extract on cyclophosphamide-induced testicular injury in rats. Chemico-  
Biological Interactions 2014; 224:196–205
47. Peltola V, Huhtaniemi I, Ahotupa M. Antioxidant enzyme activity in the maturing rat  
testis. J. Androl. 1992;13: 450–455.
48. Valavanidis A, Vlachogianni T, and Fiotakis C. 8-hydroxy-2'-deoxyguanosine (8-  
OHdG): A Critical Biomarker of Oxidative Stress and Carcinogenesis. Journal of  
Environmental Science and Health Part C 2009; 27:120–139.
49. Fathy M, Khalifa EM, Atef Fawzy M. Modulation of inducible nitric oxide synthase  
pathway by eugenol and telmisartan in carbon tetrachloride-induced liver injury in rats.  
Life Sciences 2019;216:207-214

50. Clancy RM, Abramson SB. Nitric oxide: a novel mediator of inflammation. *Proc. Soc. Exp. Biol. Med.* 1995; 210(2):93–101.
51. Iwakiri Y. Nitric oxide synthase generates nitric oxide locally to regulate compartmentalized protein S-nitrosylation and protein trafficking, *Proc. Natl. Acad. Sci.* 2006; 103 (52):19777–19782.
52. Szabó C, Ohshima H. DNA damage induced by peroxynitrite: subsequent biological effects. *Nitric Oxide* 1997; 1(5): 373–385.
53. Li J, Yuan J. Caspases in apoptosis and beyond. *Oncogene* 2008; 27: 6194-6206.
54. Lavrik IN, Golks A, Krammer PH. Caspases: pharmacological manipulation of cell death. *J Clin Invest.* 2005;115:2665-2672.
55. Jessel R, Haertel S, Socaciu C, Tykhonova S, Diehl HA. Kinetics of apoptotic markers in exogeneously induced apoptosis of EL4 cells. *J Cell Mol Med.* 2002;6:82-92.
56. Sakahira H, Enari M, Nagata S. Cleavage of CAD inhibitor in CAD activation and DNA degradation during apoptosis. *Nature* 1998; 391: 96-99.
57. Elmore S. Apoptosis: A Review of Programmed Cell Death. *Toxicologic Pathology* 2007; 35:495-516.
58. Motawi TMK, Sadik NAH, Refaat A. Cytoprotective effects of DL-alpha-lipoic acid or squalene on cyclophosphamide-induced oxidative injury: an experimental study on rat myocardium, testicles and urinary bladder. *Food Chem. Toxicol.* 2010;48:2326–2336.
59. Abarikwu SO, Otuechere CA, Ekor M, Monwuba K, Osobu D. Rutin ameliorates cyclophosphamide-induced reproductive toxicity in male rats. *Toxicol. Int.* 2012;19:207–214.

60. Sherins RJ, Hodgen GD. Testicular gamma glutamyl-transpeptidase: an index of Sertoli cell function in man, *J. Reprod. Fertil.* 48 (1976) 191–193.
61. Roa J, Garcia-Galiano D, Varela L, S\_anchez-Garrido MA, Pineda R, Castellano JM, Ruiz-Pino F, Romero M, Aguilar E, L\_opez M, Gaytan F, Di\_eguez C, Pinilla L and Tena-Sempere M. (2009). The mammalian target of rapamycin as novel central regulator of puberty onset via modulation of hypothalamic Kiss1 system. *Endocrinology*; 150:5016–5026.
62. Saylam B, Efesoy O, Cayan S. The effect of aromatase inhibitor letrozole on body mass index, serum hormones, and sperm parameters in infertile men. *Fertil Steril.* 2011; 95: 809–811.
63. Jutte NH, Jansen R, Grootegoed JA, Rommerts FF, van der Molen HJ. FSH stimulation of the production of pyruvate and lactate by rat sertoli cells may be involved in hormonal regulation of spermatogenesis. *J. Reprod. Fertil.* 1983;68:219–226.
64. Foster WG, McMahon A, YoungLai EV, Hughes EG and Rice DC. Reproductive endocrine effects of chronic lead exposure in the male cynomolgus monkey. *Reprod. Toxicol.* 1993; 7: 203-209.

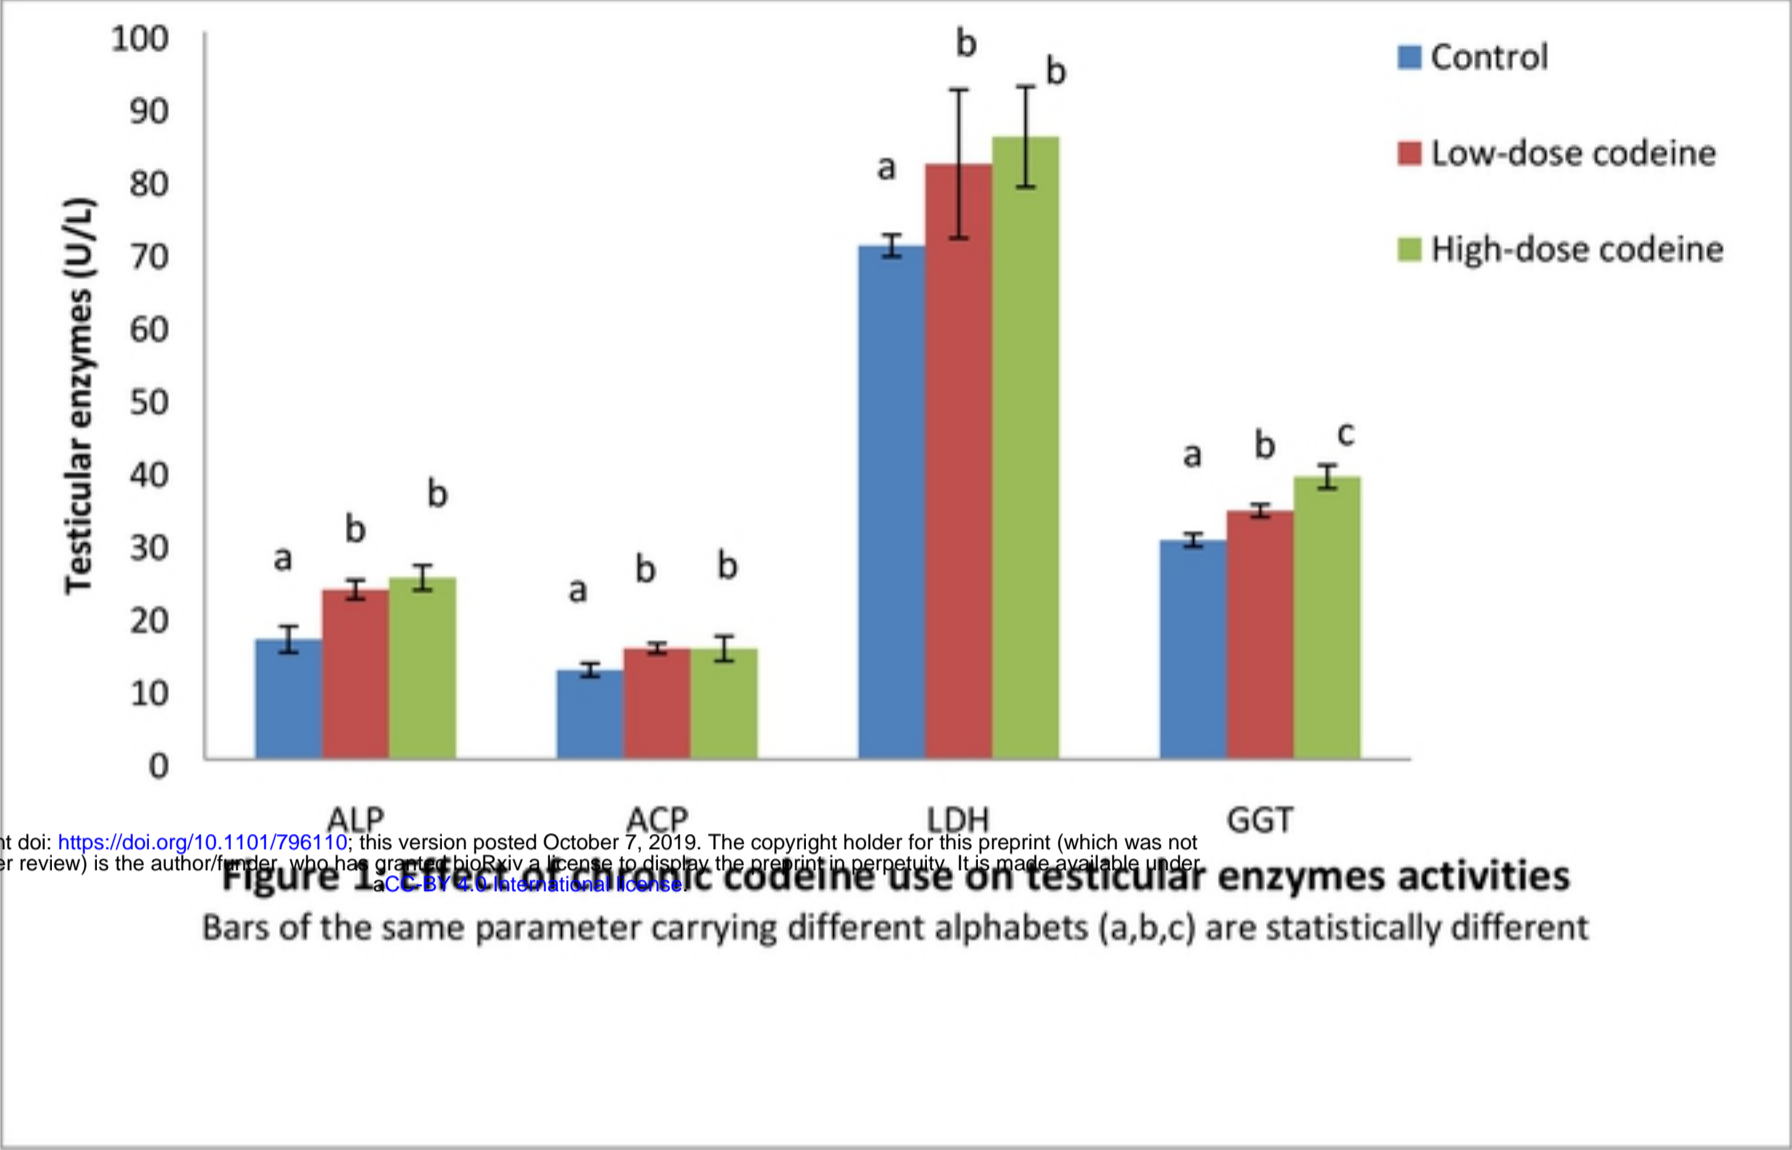

Figure 1

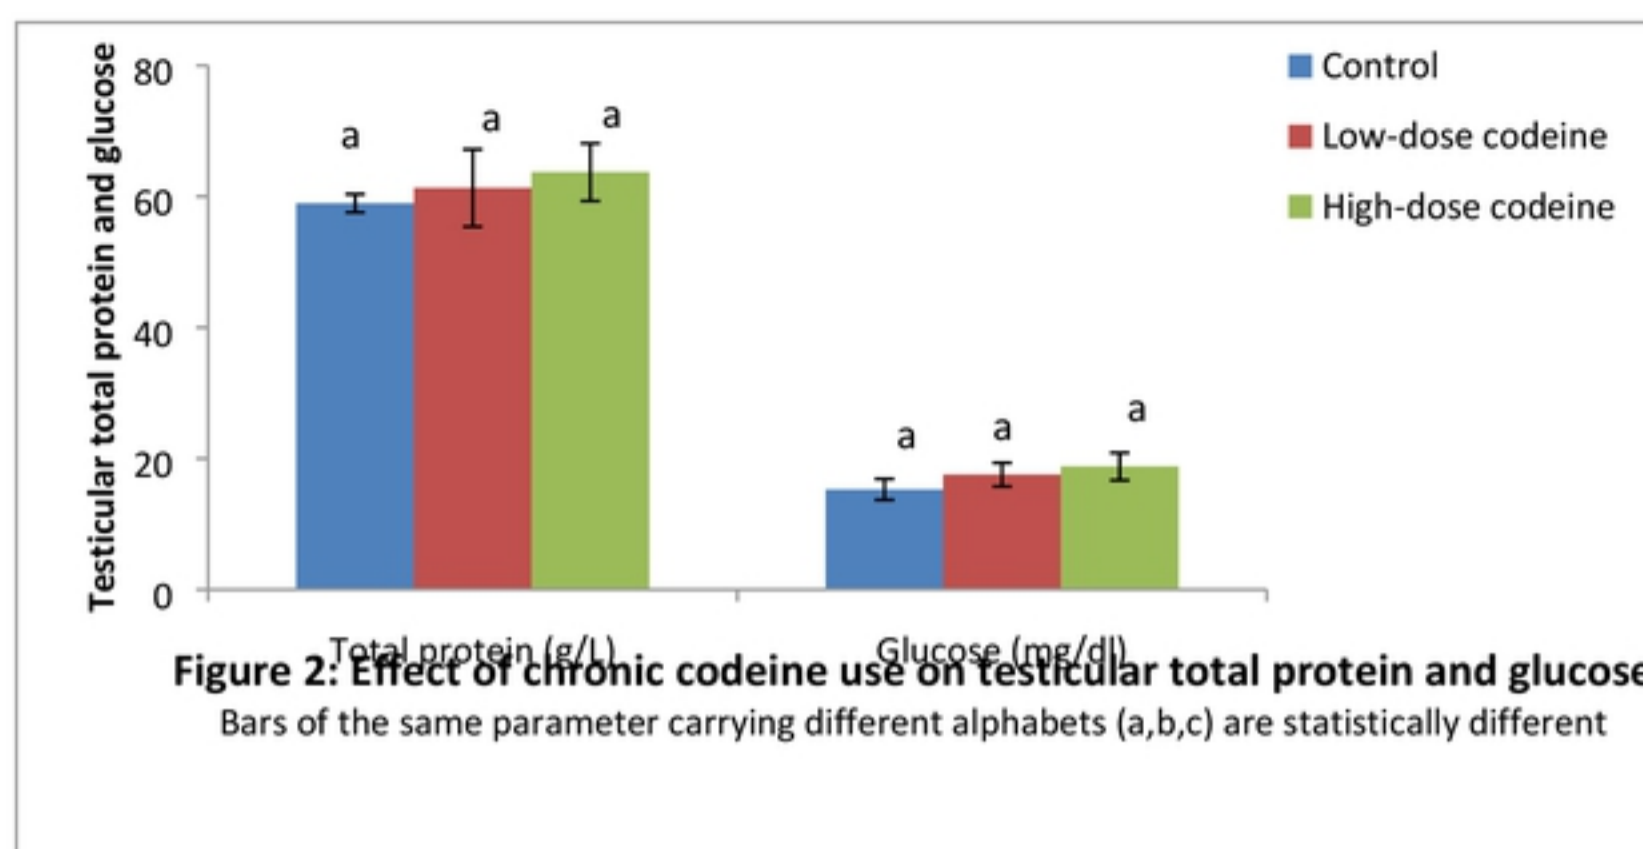

bioRxiv preprint doi: <https://doi.org/10.1101/796110>; this version posted October 7, 2019. The copyright holder for this preprint (which was not certified by peer review) is the author/funder, who has granted bioRxiv a license to display the preprint in perpetuity. It is made available under aCC-BY 4.0 International license.

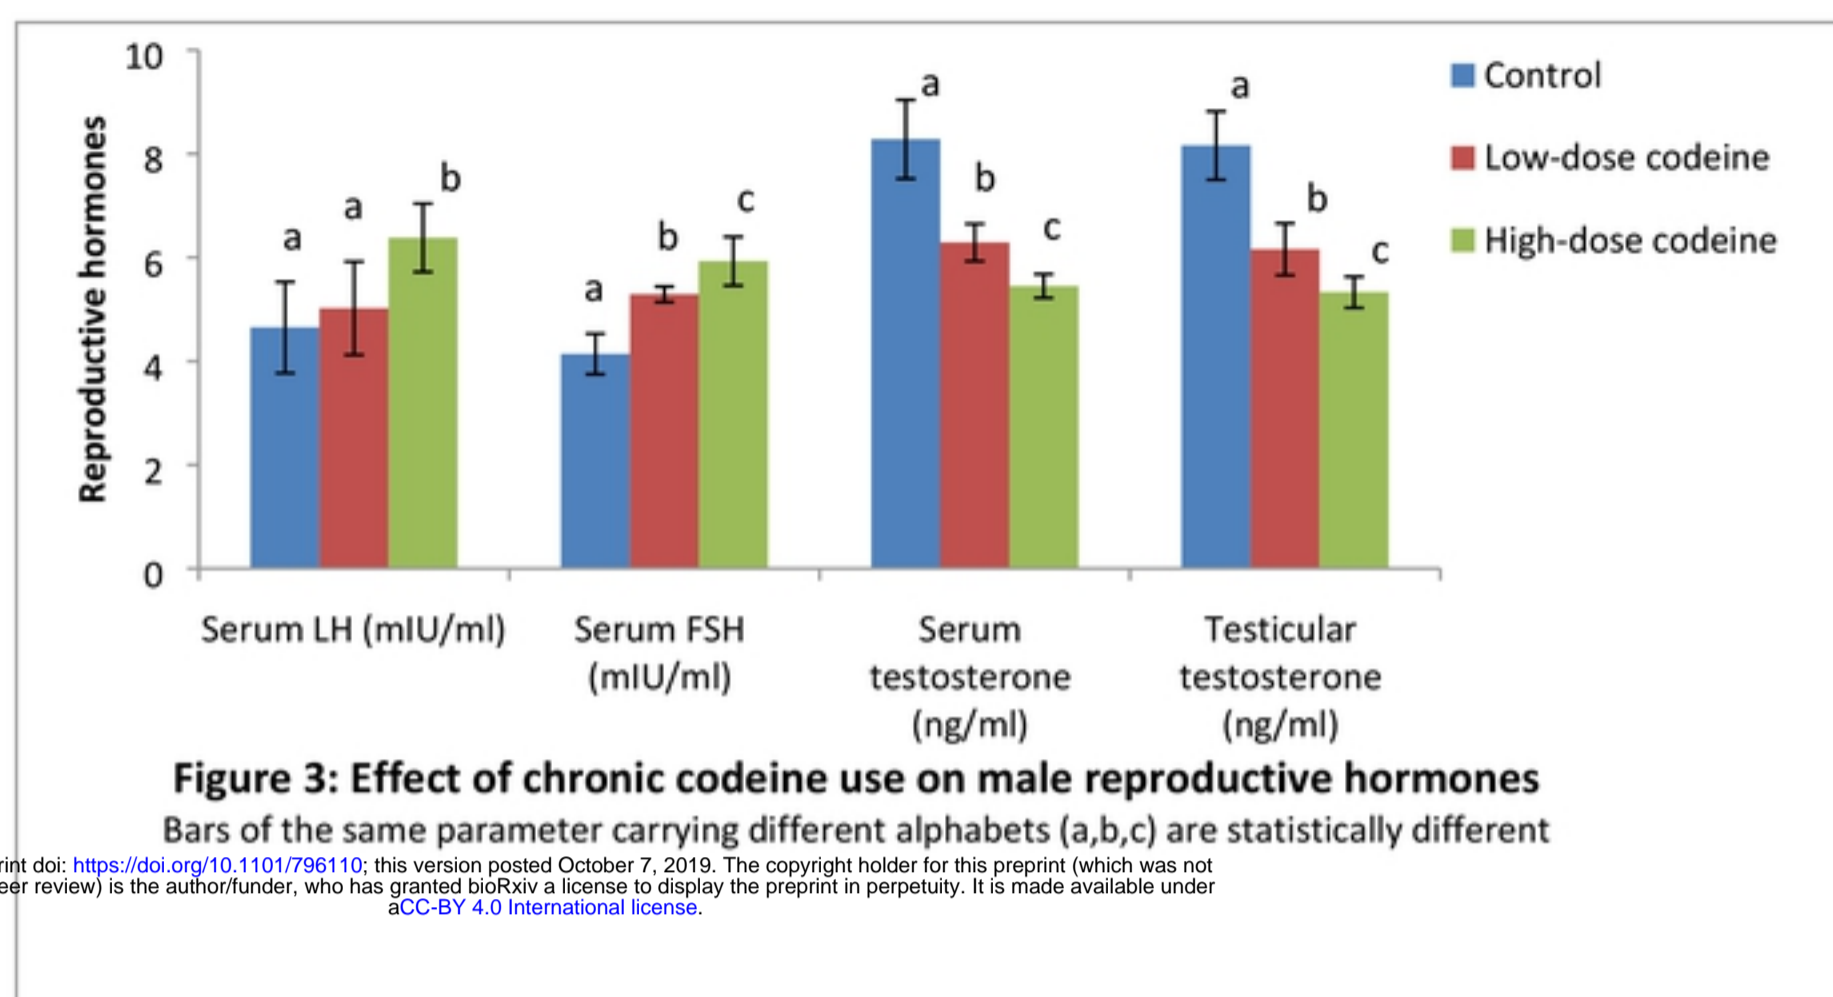

Figure 3

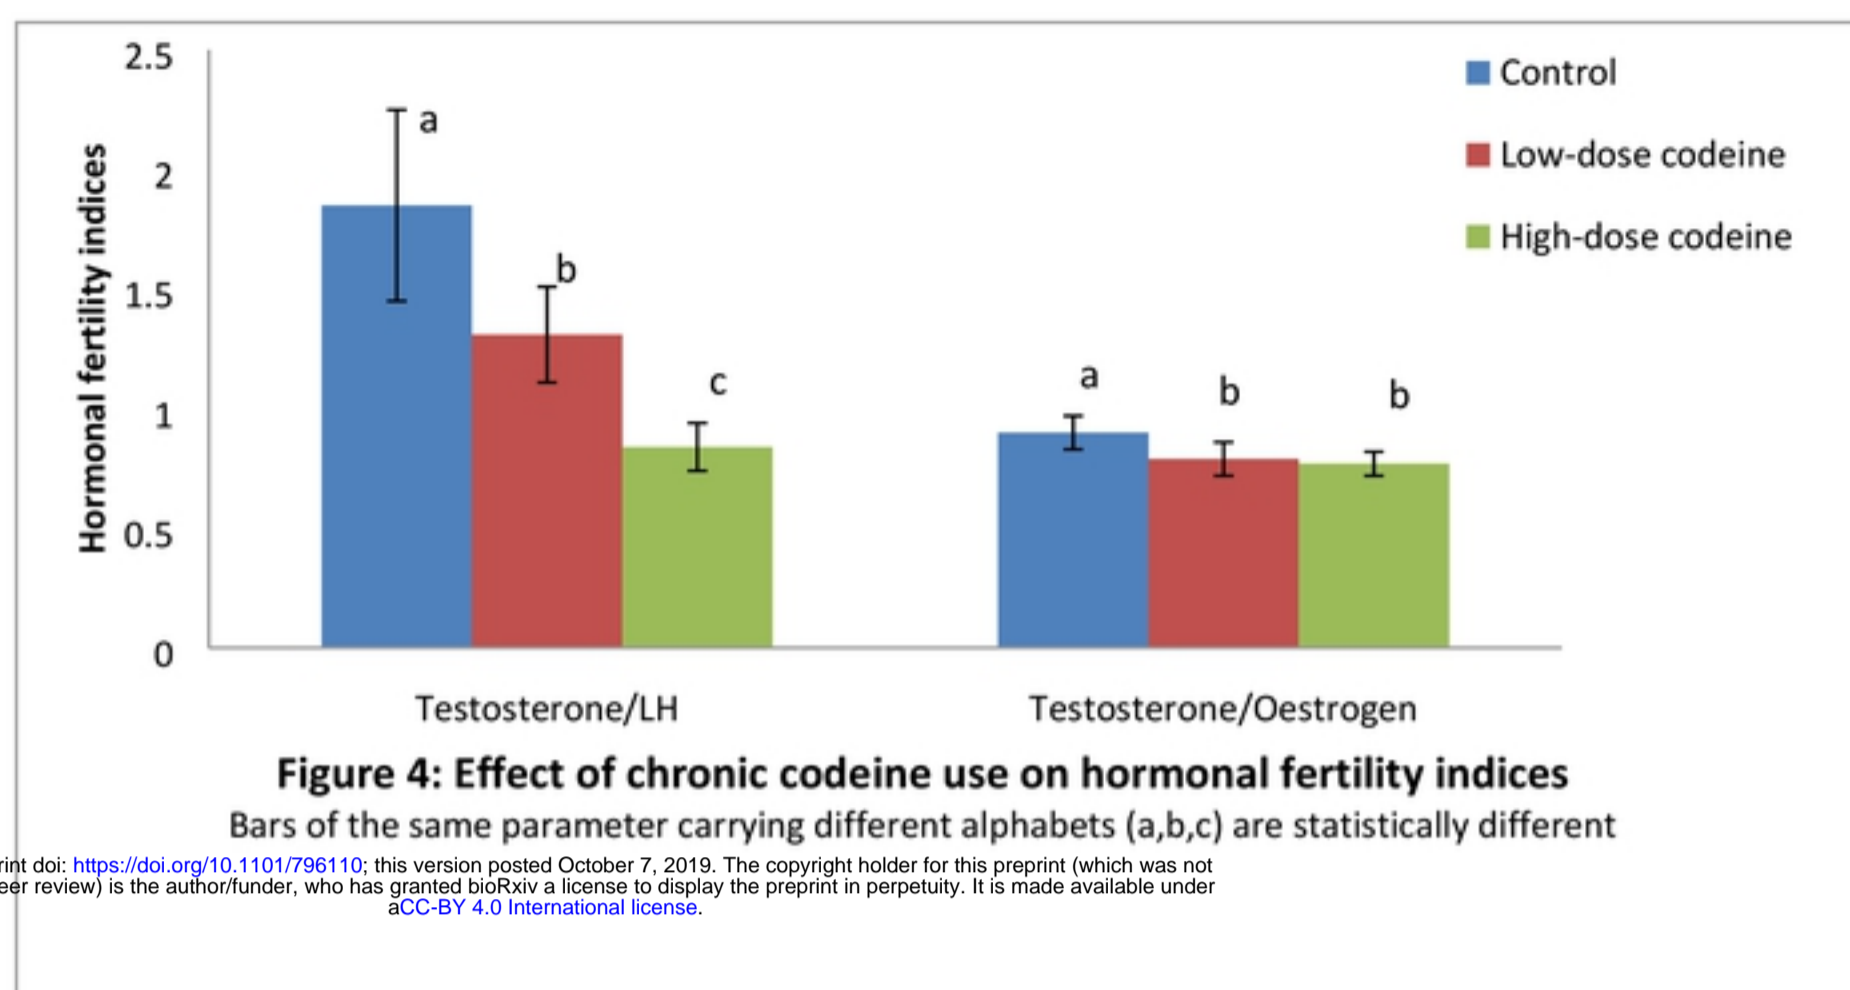

Figure 4

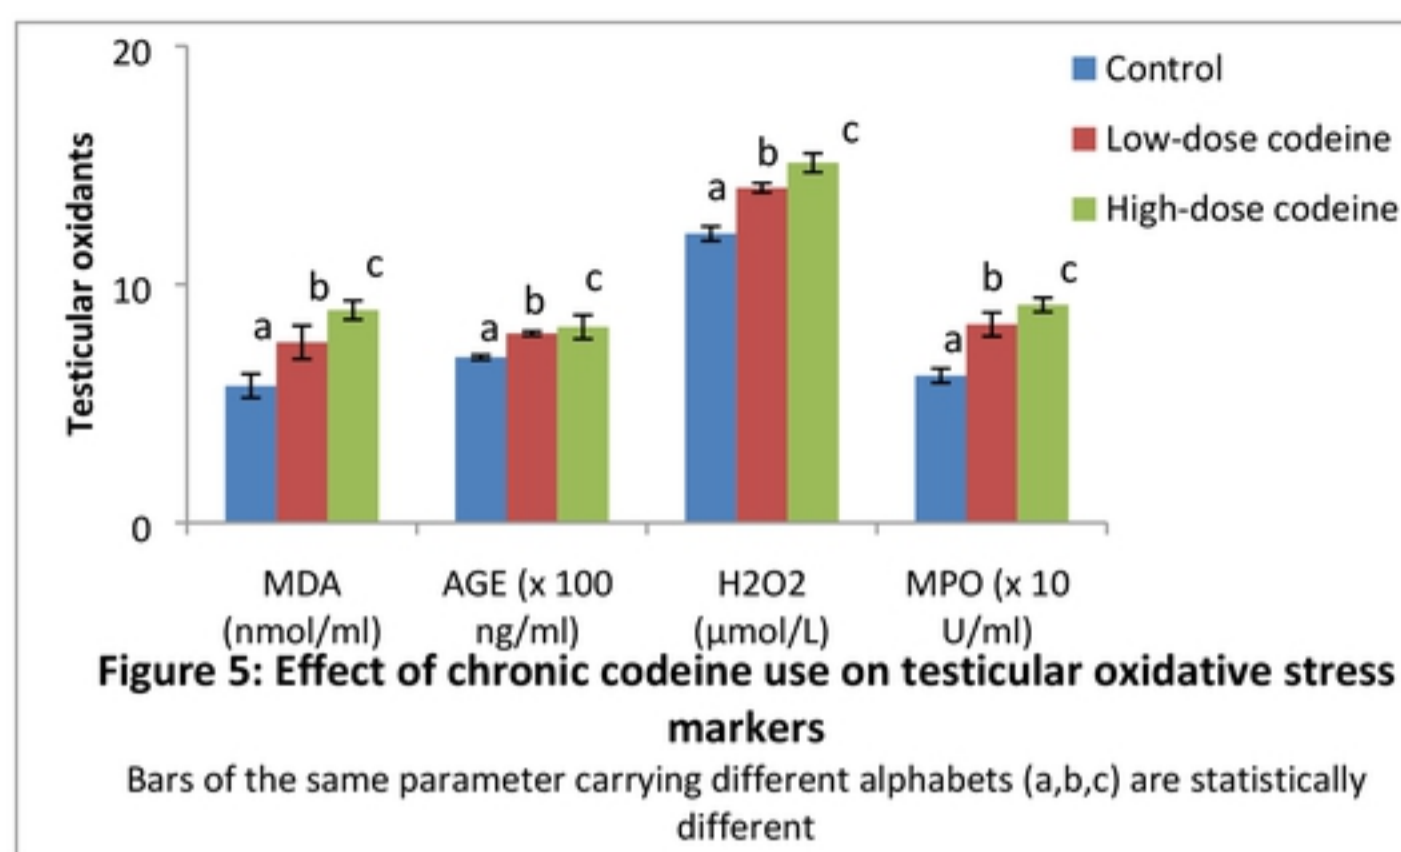

bioRxiv preprint doi: <https://doi.org/10.1101/796110>; this version posted October 7, 2019. The copyright holder for this preprint (which was not certified by peer review) is the author/funder, who has granted bioRxiv a license to display the preprint in perpetuity. It is made available under aCC-BY 4.0 International license.

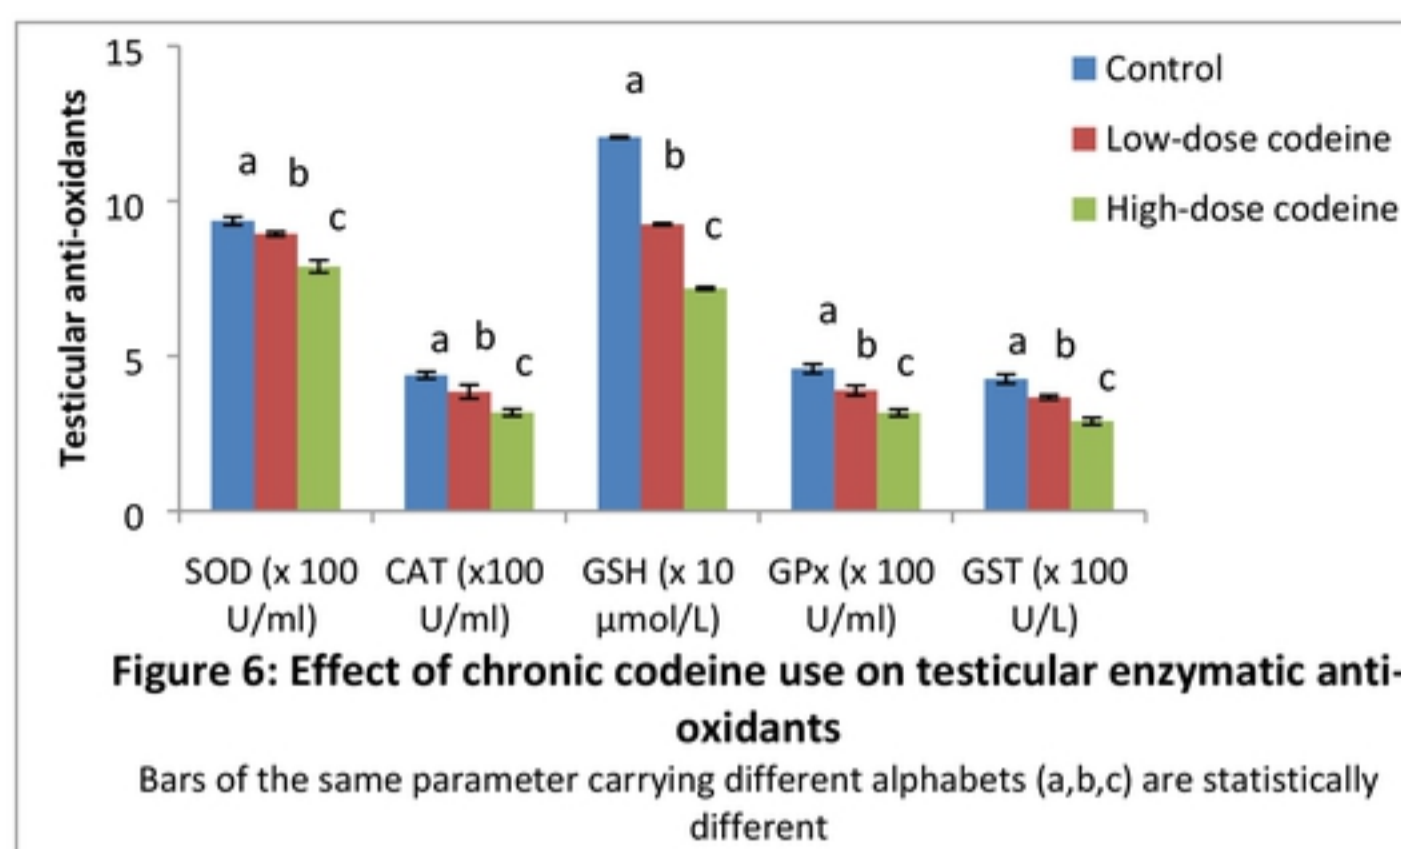

bioRxiv preprint doi: <https://doi.org/10.1101/796110>; this version posted October 7, 2019. The copyright holder for this preprint (which was not certified by peer review) is the author/funder, who has granted bioRxiv a license to display the preprint in perpetuity. It is made available under aCC-BY 4.0 International license.

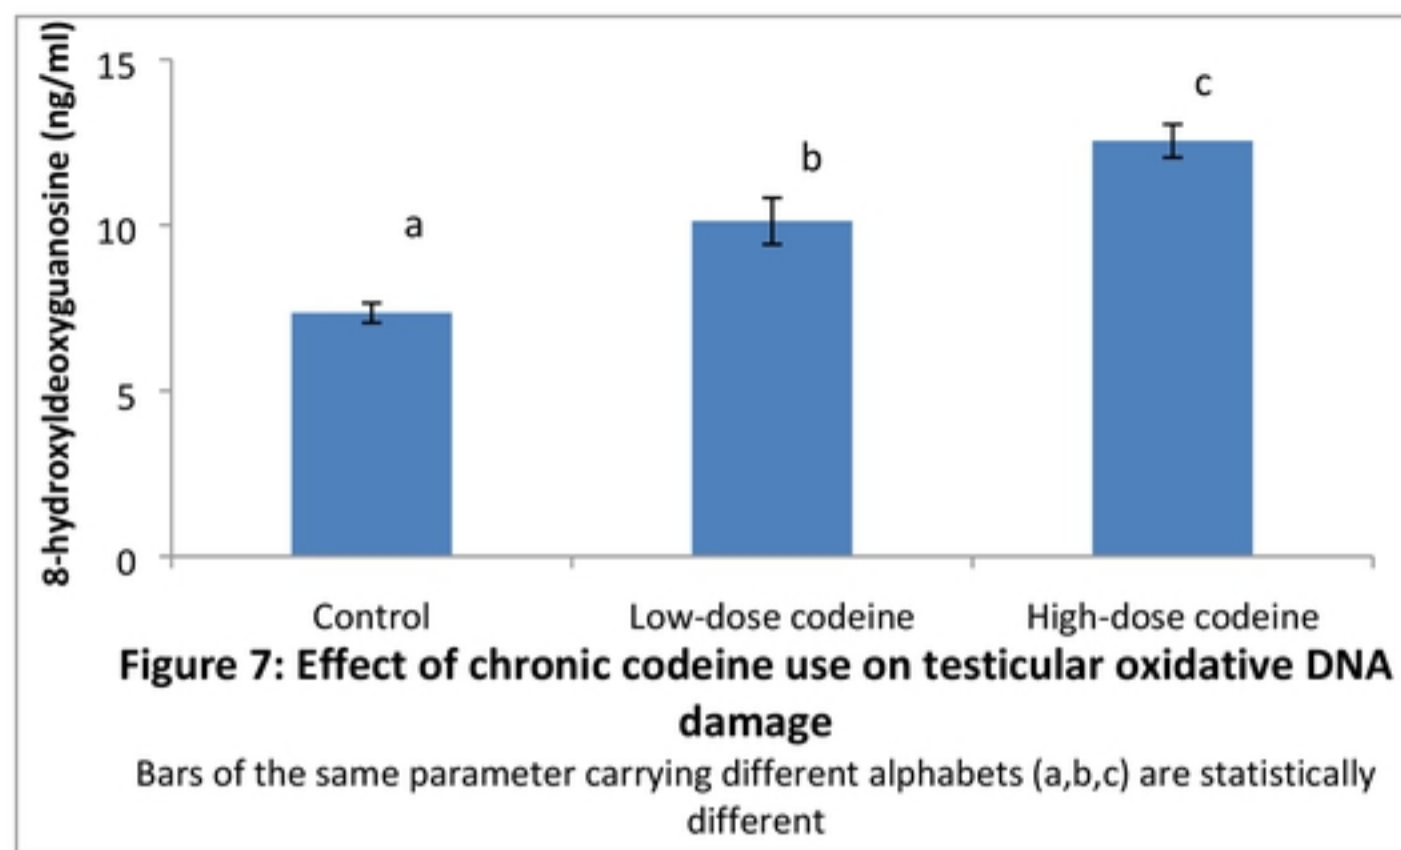

bioRxiv preprint doi: <https://doi.org/10.1101/796110>; this version posted October 7, 2019. The copyright holder for this preprint (which was not certified by peer review) is the author/funder, who has granted bioRxiv a license to display the preprint in perpetuity. It is made available under aCC-BY 4.0 International license.

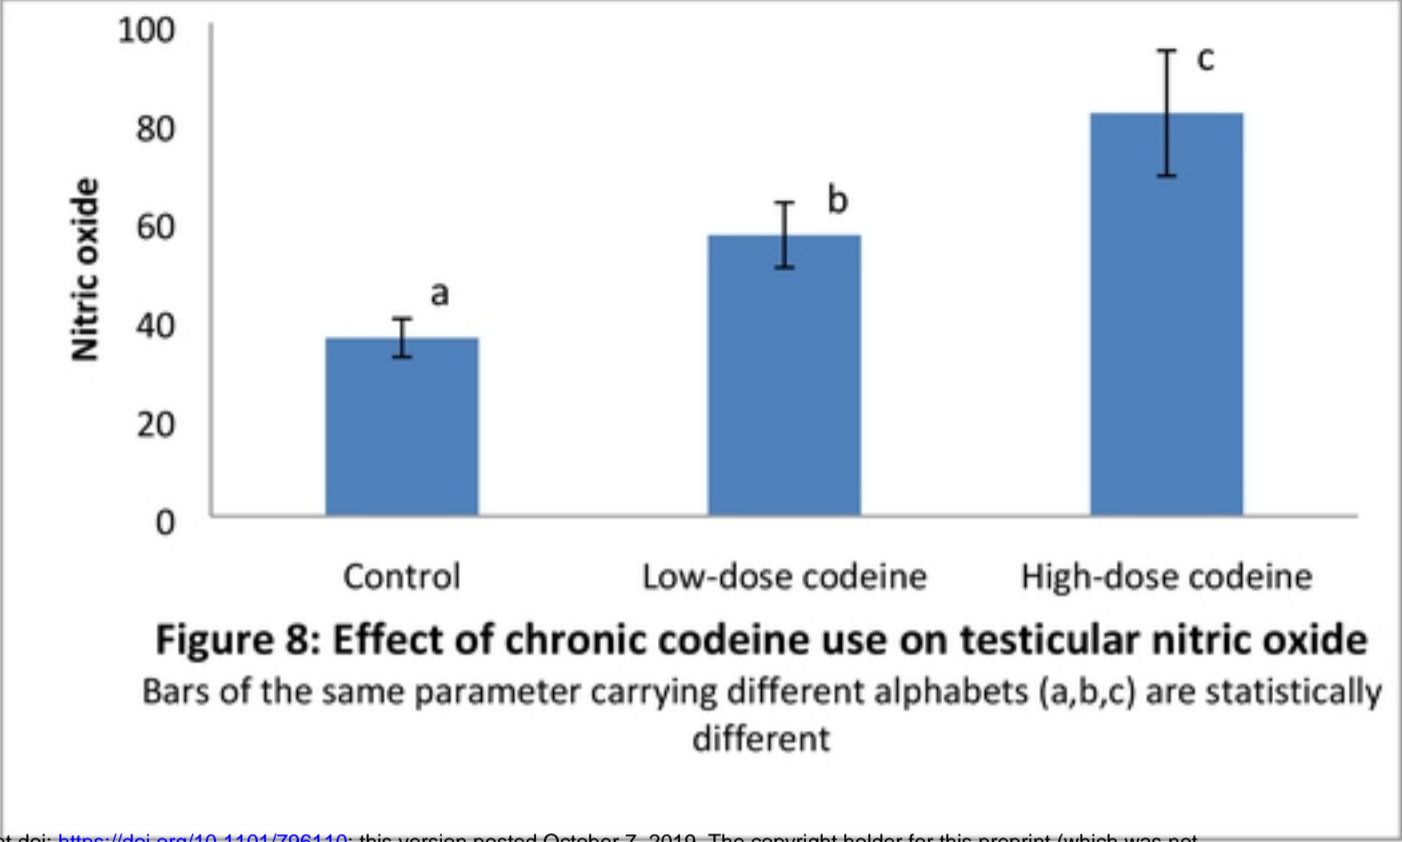

bioRxiv preprint doi: <https://doi.org/10.1101/796110>; this version posted October 7, 2019. The copyright holder for this preprint (which was not certified by peer review) is the author/funder, who has granted bioRxiv a license to display the preprint in perpetuity. It is made available under aCC-BY 4.0 International license.

Figure 8

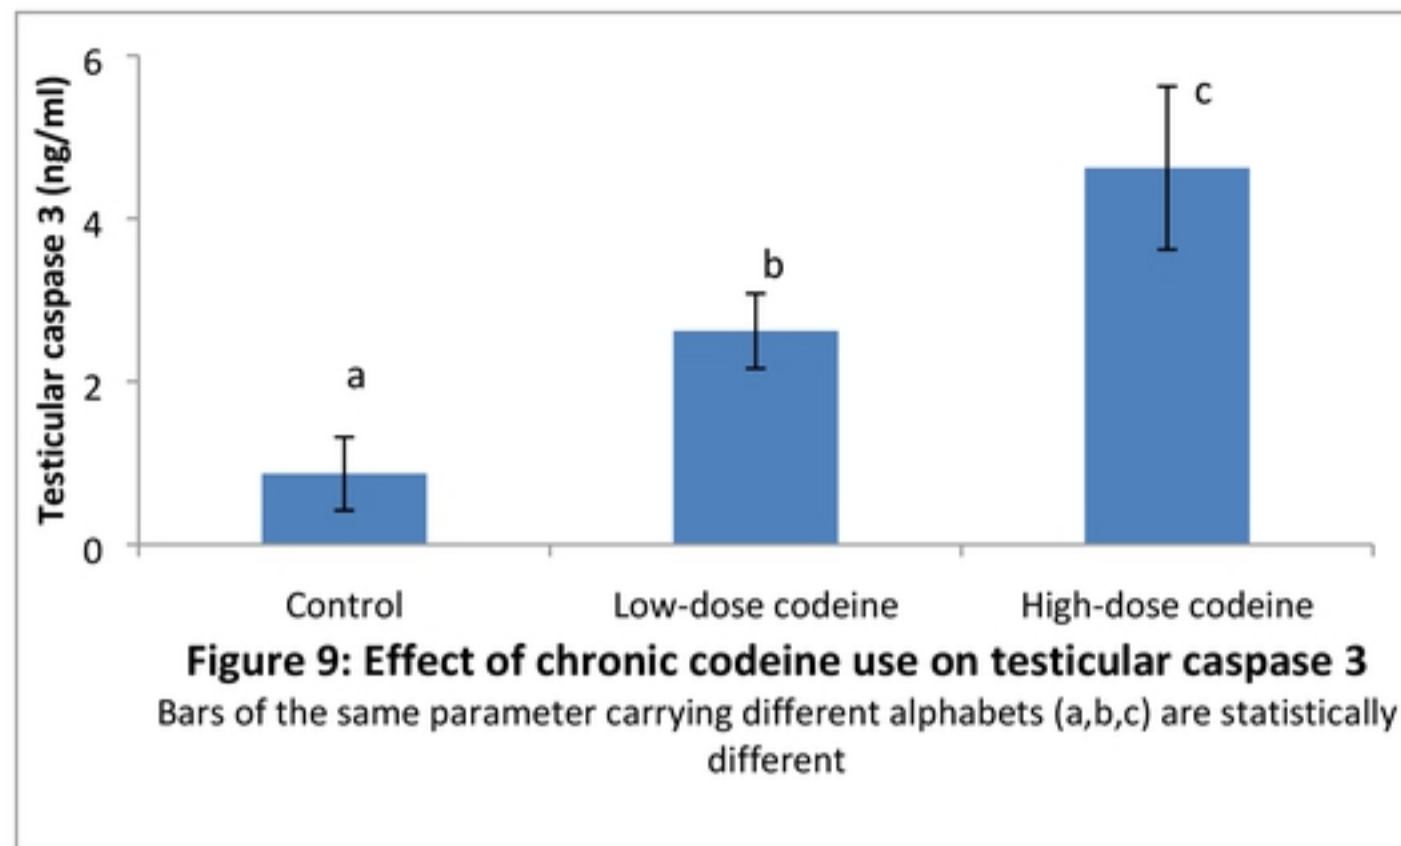

bioRxiv preprint doi: <https://doi.org/10.1101/796110>; this version posted October 7, 2019. The copyright holder for this preprint (which was not certified by peer review) is the author/funder, who has granted bioRxiv a license to display the preprint in perpetuity. It is made available under aCC-BY 4.0 International license.

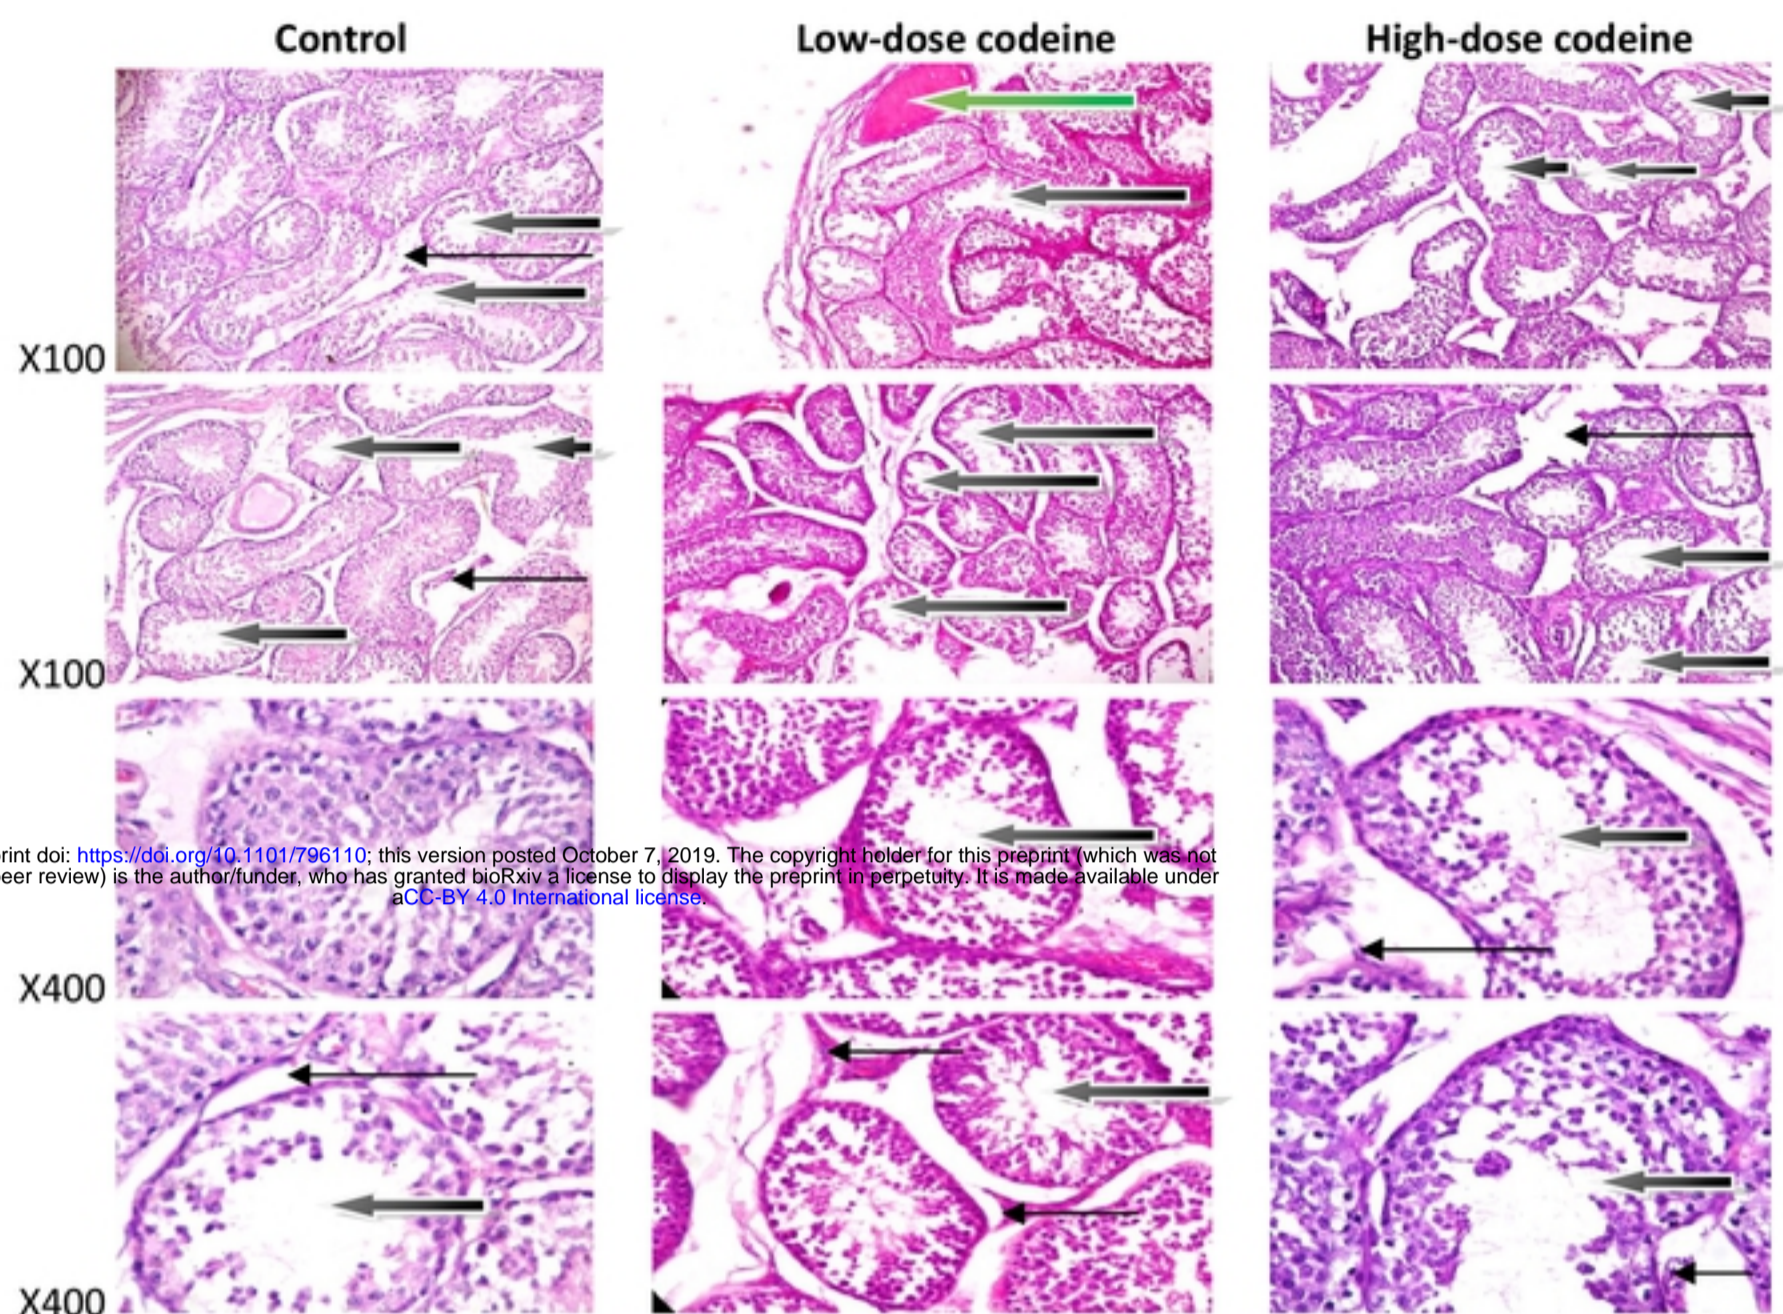

**Figure 10: Photomicrographs of testicular sections stained by Haematoxylin and Eosin.**

The control shows some normal seminiferous tubules containing normal germ cells including spermatogonia cells and sertoli cells, and normal maturation stages with presence of spermatozoa within their lumen(white arrow). There very few tubules show maturation arrest at secondary stage of maturation (black arrow).The interstitial spaces show normal leydig cells (slender arrow). The rabbits on low-dose codeine show very poor architecture. The seminiferous tubules show double cell layer or thickened propria indicative of cessation of spermatogenesis. They exhibit vacuolation, sloughed germ cells and maturation arrest and show giant cells (black arrow). There is evidence of vascular congestion (green arrow).The interstitial spaces appear normal (slender arrow). The animals on high-dose codeine show very poor architecture. The seminiferous tubules show double cell layer or thickened propria indicative of cessation of spermatogenesis. They exhibit vacuolation, sloughed germ cells and maturation arrest and show giant cells (black arrow). The interstitial spaces appear normal (slender arrow).

Table 1: Effect of chronic codeine use on body weight, testicular weight and relative testicular weight

| Group                    | Initial BW (g)            | Final BW (g)              | Difference (g)            | Difference (%)            | PTW (g)                | PTW/BWX 100            |
|--------------------------|---------------------------|---------------------------|---------------------------|---------------------------|------------------------|------------------------|
| <b>Control</b>           | 872.00±69.63 <sup>a</sup> | 1379.1±54.51 <sup>a</sup> | 507.05±32.93 <sup>a</sup> | 58.6257±7.57 <sup>a</sup> | 2.84±0.19 <sup>a</sup> | 0.21±0.01 <sup>a</sup> |
| <b>Low-dose codeine</b>  | 866.62±60.21 <sup>a</sup> | 1353.8±71.95 <sup>a</sup> | 487.18±26.15 <sup>a</sup> | 56.3971±4.24 <sup>a</sup> | 1.40±0.55 <sup>b</sup> | 0.11±0.04 <sup>b</sup> |
| <b>High-dose codeine</b> | 818.91±46.69 <sup>a</sup> | 1305.2±64.86 <sup>a</sup> | 486.32±26.69 <sup>a</sup> | 59.4614±3.22 <sup>a</sup> | 0.91±0.38 <sup>b</sup> | 0.07±0.03 <sup>b</sup> |

Values represent mean±SD for 7 replicates in each group. BW, body weight of rats; PTW, paired testicular weight. Parameters carrying different superscripts are significantly different at  $p < 0.05$ .

Table 2: Comparison of some fertility indices with markers of oxidative DNA damage, inflammation, and apoptosis relative testicular weight

|                            | 8-OHdG | Nitric oxide | Caspase 3 |
|----------------------------|--------|--------------|-----------|
| Paired testicular weight   | -0.836 | -0.840       | -0.749    |
| Relative testicular weight | -0.823 | -0.824       | -0.713    |
| Testicular testosterone    | -0.864 | -0.825       | -0.832    |
| Serum testosterone         | -0.894 | -0.828       | -0.824    |
| Testosterone/LH            | -0.803 | -0.781       | -0.731    |
| Testosterone/Oestrogen     | -0.624 | -0.564       | -0.498    |

P < 0.01

bioRxiv preprint doi: <https://doi.org/10.1101/796110>; this version posted October 7, 2019. The copyright holder for this preprint (which was not certified by peer review) is the author/funder, who has granted bioRxiv a license to display the preprint in perpetuity. It is made available under aCC-BY 4.0 International license.

Values represent mean±SD for 7 replicates in each group. BW, body weight of rats; PTW, paired testicular weight. Parameters carrying different superscripts are significantly different at p < 0.05.
